# Supplementary material
Source: PubMed Central journal article supplement (PMC8820244)
Supplement: NEJMoa2116414_disclosures.pdf [file NEJMoa2116414_disclosures.pdf]

**Disclosure Purpose:** 21-16414

**Summary of Interests**

I do not have any interests to disclose at this time.

**Additional Questions:**

- 1. **Are there other relationships or activities that readers could perceive to have influenced, or that give the appearance of potentially influencing, what you wrote in the submitted work?**  
No.
- 2. **What is the manuscript title?**  
Heterologous SARS-CoV-2 Booster Vaccinations – Preliminary Report
- 3. **Are you the corresponding author?**  
No.

**Certification**

I certify that the information provided in this disclosure is complete and accurate.

Disclosure Purpose: 21-16414

## Summary of Interests

I do not have any interests to disclose at this time.

## Additional Questions:

1. **Are there other relationships or activities that readers could perceive to have influenced, or that give the appearance of potentially influencing, what you wrote in the submitted work?**

No.

2. **What is the manuscript title?**

Heterologous SARS-CoV-2 Booster Vaccinations – Preliminary Report

3. **Are you the corresponding author?**

Yes.

- a. **Please list the other authors' names here.**

Kirsten E. Lyke, M.D., Meagan E. Deming, M.D., Ph.D, Lisa A. Jackson, M.D., M.P.H., Angela R. Branche, M.D., Hana M. El Sahly, M.D., Christina A. Rostad, M.D., Judith M. Martin, M.D., Christine Johnston, M.D., M.P.H., Richard E. Rupp, M.D., Mark J. Mulligan, M.D., Rebecca C. Brady, M.D., Robert W. Frenck, Jr., M.D., Martín Bäcker, M.D., Angelica C. Kottkamp, M.D., Tara M. Babu, M.D., M.S.C.I., Kumaravel Rajakumar, M.D., M.S., Srilatha Edupuganti, M.D., M.P.H., David Dobrzynski, M.D., Rhea N. Coler, M.Sc., Ph.D., Christine M. Posavad, Ph.D., Janet I. Archer, M.Sc., Sonja Crandon, B.S.N., Seema U. Nayak, M.D., Daniel Szydlo, M.S., Jillian A. Zemanek, M.P.H., Clara P. Dominguez Islas, Ph.D, Elizabeth R. Brown, Sc.D., Mehul S. Suthar, Ph.D., M. Juliana McElrath, M.D., Ph.D., Adrian B. McDermott, Ph.D., Sarah E. O'Connell, M.S., David C. Montefiori, Ph.D., Amanda Eaton, M.B.A., Kathleen M. Neuzil, M.D., David S. Stephens, M.D., Paul C. Roberts, Ph.D., John H. Beigel, M.D.

## Certification

I certify that the information provided in this disclosure is complete and accurate.

**Disclosure Purpose:** 21-16414

### Summary of Interests

I do not have any interests to disclose at this time.

### Additional Questions:

- Are there other relationships or activities that readers could perceive to have influenced, or that give the appearance of potentially influencing, what you wrote in the submitted work?**  
No.
- What is the manuscript title?**  
Heterologous SARS-CoV-2 Booster Vaccinations – Preliminary Report
- Are you the corresponding author?**  
No.

### Certification

I certify that the information provided in this disclosure is complete and accurate.

**Disclosure Purpose:** 21-16414

**Summary of Interests**

I do not have any interests to disclose at this time.

**Additional Questions:**

- 1. **Are there other relationships or activities that readers could perceive to have influenced, or that give the appearance of potentially influencing, what you wrote in the submitted work?**  
No.
- 2. **What is the manuscript title?**  
Heterologous SARS-CoV-2 Booster Vaccinations – Preliminary Report
- 3. **Are you the corresponding author?**  
No.

**Certification**

I certify that the information provided in this disclosure is complete and accurate.

**Disclosure Purpose:** 21-16414

**Summary of Interests**

I do not have any interests to disclose at this time.

**Additional Questions:**

- 1. **Are there other relationships or activities that readers could perceive to have influenced, or that give the appearance of potentially influencing, what you wrote in the submitted work?**  
No.
- 2. **What is the manuscript title?**  
Heterologous SARS-CoV-2 Booster Vaccinations – Preliminary Report
- 3. **Are you the corresponding author?**  
No.

**Certification**

I certify that the information provided in this disclosure is complete and accurate.

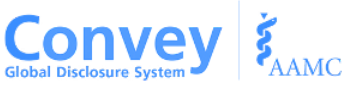

Disclosure Purpose: 21-16414

## Summary of Interests

### Company or Organization

| Entity                                                                                                                                                                                                      | Type             | Interest Held By                                                                |
|-------------------------------------------------------------------------------------------------------------------------------------------------------------------------------------------------------------|------------------|---------------------------------------------------------------------------------|
| <a href="#">AstraZeneca</a>                                                                                                                                                                                 | Grant / Contract | Other - Cincinnati Children's Hospital Medical Center                           |
| <i>Recipient Name:</i> Cincinnati Children's Hospital Medical Center<br><i>Grant / Contract Description:</i> Conduct of clinical trials of COVID-19 candidate vaccines<br><i>Additional Information:</i>    |                  | <i>Recipient Type:</i> Institution<br><i>Grant / Contract Purpose:</i> Research |
| <a href="#">PATH</a>                                                                                                                                                                                        | Grant / Contract | Other - Cincinnati Children's Hospital Medical Center                           |
| <i>Recipient Name:</i> Cincinnati Children's Hospital Medical Center<br><i>Grant / Contract Description:</i> Conduct of clinical trials of NIPAH virus candidate vaccines<br><i>Additional Information:</i> |                  | <i>Recipient Type:</i> Institution<br><i>Grant / Contract Purpose:</i> Research |
| <a href="#">Pfizer Inc.</a>                                                                                                                                                                                 | Grant / Contract | Other - Cincinnati Children's Hospital Medical Center                           |
| <i>Recipient Name:</i> Cincinnati Children's Hospital Medical Center<br><i>Grant / Contract Description:</i> Conduct of clinical trials of candidate COVID-19 vaccines<br><i>Additional Information:</i>    |                  | <i>Recipient Type:</i> Institution<br><i>Grant / Contract Purpose:</i> Research |

### Additional Questions:

- Are there other relationships or activities that readers could perceive to have influenced, or that give the appearance of potentially influencing, what you wrote in the submitted work?**  
No.
- What is the manuscript title?**  
Heterologous SARS-CoV-2 Booster Vaccinations-Preliminary Report
- Are you the corresponding author?**  
No.

### Certification

I certify that the information provided in this disclosure is complete and accurate.

Disclosure Purpose: 21-16414

## Summary of Interests

### Company or Organization

| Entity                                                                                            | Type             | Interest Held By                                      |
|---------------------------------------------------------------------------------------------------|------------------|-------------------------------------------------------|
| <a href="#">AstraZeneca</a>                                                                       | Grant / Contract | Other - Cincinnati Children's Hospital Medical Center |
| <i>Recipient Name:</i> Cincinnati Children's Hospital Medical Center                              |                  | <i>Recipient Type:</i> Institution                    |
| <i>Grant / Contract Description:</i> Conduct of clinical trials of COVID-19 candidate vaccines    |                  | <i>Grant / Contract Purpose:</i> Research             |
| <i>Additional Information:</i>                                                                    |                  |                                                       |
| <a href="#">PATH</a>                                                                              | Grant / Contract | Other - Cincinnati Children's Hospital Medical Center |
| <i>Recipient Name:</i> Cincinnati Children's Hospital Medical Center                              |                  | <i>Recipient Type:</i> Institution                    |
| <i>Grant / Contract Description:</i> Conduct of clinical trials of NIPAH virus candidate vaccines |                  | <i>Grant / Contract Purpose:</i> Research             |
| <i>Additional Information:</i>                                                                    |                  |                                                       |
| <a href="#">Pfizer Inc.</a>                                                                       | Grant / Contract | Other - Cincinnati Children's Hospital Medical Center |
| <i>Recipient Name:</i> Cincinnati Children's Hospital Medical Center                              |                  | <i>Recipient Type:</i> Institution                    |
| <i>Grant / Contract Description:</i> Conduct of clinical trials of candidate COVID-19 vaccines    |                  | <i>Grant / Contract Purpose:</i> Research             |
| <i>Additional Information:</i>                                                                    |                  |                                                       |

### Additional Questions:

- Are there other relationships or activities that readers could perceive to have influenced, or that give the appearance of potentially influencing, what you wrote in the submitted work?**

No.
- What is the manuscript title?**

Heterologous SARS-CoV-2 Booster Vaccinations-Preliminary Report
- Are you the corresponding author?**

No.

### Certification

I certify that the information provided in this disclosure is complete and accurate.

**Disclosure Purpose:** 21-16414

### Summary of Interests

I do not have any interests to disclose at this time.

### Additional Questions:

- Are there other relationships or activities that readers could perceive to have influenced, or that give the appearance of potentially influencing, what you wrote in the submitted work?**  
No.
- What is the manuscript title?**  
Heterologous SARS-CoV-2 Booster Vaccinations – Preliminary Report
- Are you the corresponding author?**  
No.

### Certification

I certify that the information provided in this disclosure is complete and accurate.



Disclosure Purpose: 21-16414

Summary of Interests

**Company or Organization**

| Entity                                                                                                                                  | Type                       | Interest Held By                                                       |
|-----------------------------------------------------------------------------------------------------------------------------------------|----------------------------|------------------------------------------------------------------------|
| <b>Bill and Melinda Gates Foundation</b>                                                                                                | Grant / Contract           | Self                                                                   |
| <i>Recipient Name:</i> University of Washington<br><i>Grant / Contract Description:</i><br><i>Additional Information:</i>               |                            | <i>Recipient Type:</i> Institution<br><i>Grant / Contract Purpose:</i> |
| <b>Fred Hutchinson Cancer Research Center</b>                                                                                           | Employment                 | Self                                                                   |
| <i>Title:</i> Professor<br><i>Additional Information:</i>                                                                               |                            | <i>Position Description:</i> Faculty biostatistician                   |
| <b>Merck Sharp and Dohme</b>                                                                                                            | Data And Safety Monitoring | Self                                                                   |
| <i>Category:</i> Data And Safety Monitoring<br><i>Additional Information:</i>                                                           |                            | <i>Description:</i> Statistician on a DSMB                             |
| <b>National Institute of Allergy and Infectious Diseases</b>                                                                            | Grant / Contract           | Self                                                                   |
| <i>Recipient Name:</i> Fred Hutchinson Cancer Research Center<br><i>Grant / Contract Description:</i><br><i>Additional Information:</i> |                            | <i>Recipient Type:</i> Institution<br><i>Grant / Contract Purpose:</i> |

Additional Questions:

- Are there other relationships or activities that readers could perceive to have influenced, or that give the appearance of potentially influencing, what you wrote in the submitted work?**  
No.
- What is the manuscript title?**  
Heterologous SARS-CoV-2 Booster Vaccinations – Preliminary Report
- Are you the corresponding author?**  
No.

Certification

I certify that the information provided in this disclosure is complete and accurate.

**Disclosure Purpose:** 21-16414

**Summary of Interests**

I do not have any interests to disclose at this time.

**Additional Questions:**

- 1. **Are there other relationships or activities that readers could perceive to have influenced, or that give the appearance of potentially influencing, what you wrote in the submitted work?**  
No.
- 2. **What is the manuscript title?**  
Heterologous SARS-CoV-2 Booster Vaccinations – Preliminary Report
- 3. **Are you the corresponding author?**  
No.

**Certification**

I certify that the information provided in this disclosure is complete and accurate.



**Disclosure Purpose:** 21-16414

**Summary of Interests**

I do not have any interests to disclose at this time.

**Additional Questions:**

- 1. **Are there other relationships or activities that readers could perceive to have influenced, or that give the appearance of potentially influencing, what you wrote in the submitted work?**  
No.
- 2. **What is the manuscript title?**  
Heterologous SARS-CoV-2 Booster Vaccinations - Preliminary Report
- 3. **Are you the corresponding author?**  
No.

**Certification**

I certify that the information provided in this disclosure is complete and accurate.



**Disclosure Purpose:** 21-16414

### Summary of Interests

I do not have any interests to disclose at this time.

### Additional Questions:

- Are there other relationships or activities that readers could perceive to have influenced, or that give the appearance of potentially influencing, what you wrote in the submitted work?**  
No.
- What is the manuscript title?**  
Heterologous SARS-CoV-2 Booster Vaccinations – Preliminary Report
- Are you the corresponding author?**  
No.

### Certification

I certify that the information provided in this disclosure is complete and accurate.

Disclosure Purpose: 21-16414

Summary of Interests

I do not have any interests to disclose at this time.

Additional Questions:

- 1. **Are there other relationships or activities that readers could perceive to have influenced, or that give the appearance of potentially influencing, what you wrote in the submitted work?**  
No.
- 2. **What is the manuscript title?**  
Heterologous SARS-CoV-2 Booster Vaccinations – Preliminary Report
- 3. **Are you the corresponding author?**  
No.

Certification

I certify that the information provided in this disclosure is complete and accurate.



**Disclosure Purpose:** 21-16414

## Summary of Interests

**Company or Organization**

| Entity                                                         | Type  | Interest Held By |
|----------------------------------------------------------------|-------|------------------|
| <a href="#">Johnson &amp; Johnson Health Care Systems Inc.</a> | Stock | Spouse/Partner   |
| <i>Additional Information:</i>                                 |       |                  |

## Additional Questions:

- Are there other relationships or activities that readers could perceive to have influenced, or that give the appearance of potentially influencing, what you wrote in the submitted work?**  
No.
- What is the manuscript title?**  
Heterologous SARS-CoV-2 Booster Vaccinations – Preliminary Report
- Are you the corresponding author?**  
No.

## Certification

I certify that the information provided in this disclosure is complete and accurate.

**Disclosure Purpose:** 21-16414

**Summary of Interests**

I do not have any interests to disclose at this time.

**Additional Questions:**

- 1. **Are there other relationships or activities that readers could perceive to have influenced, or that give the appearance of potentially influencing, what you wrote in the submitted work?**  
No.
- 2. **What is the manuscript title?**  
Heterologous SARS-CoV-2 Booster Vaccinations – Preliminary Report
- 3. **Are you the corresponding author?**  
No.

**Certification**

I certify that the information provided in this disclosure is complete and accurate.



**Disclosure Purpose:** 21-16414

## Summary of Interests

| Company or Organization                                                                                                         |                  |                                                                                 |
|---------------------------------------------------------------------------------------------------------------------------------|------------------|---------------------------------------------------------------------------------|
| Entity                                                                                                                          | Type             | Interest Held By                                                                |
| <b>PFIZER CANADA INC</b>                                                                                                        | Grant / Contract | Self                                                                            |
| <i>Recipient Name:</i> Emory University<br><i>Grant / Contract Description:</i> drug<br><i>Additional Information:</i>          |                  | <i>Recipient Type:</i> Institution<br><i>Grant / Contract Purpose:</i> Research |
| <b>SANOFI PASTEUR INC.</b>                                                                                                      | Grant / Contract | Self                                                                            |
| <i>Recipient Name:</i> Emory University<br><i>Grant / Contract Description:</i> Vaccine study<br><i>Additional Information:</i> |                  | <i>Recipient Type:</i> Institution<br><i>Grant / Contract Purpose:</i> Research |

## Additional Questions:

- Are there other relationships or activities that readers could perceive to have influenced, or that give the appearance of potentially influencing, what you wrote in the submitted work?**  
No.
- What is the manuscript title?**  
Heterologous SARS-CoV-2 Booster Vaccinations – Preliminary Report
- Are you the corresponding author?**  
No.

## Certification

I certify that the information provided in this disclosure is complete and accurate.



**Disclosure Purpose:** 21-16414

**Summary of Interests**

I do not have any interests to disclose at this time.

**Additional Questions:**

- 1. **Are there other relationships or activities that readers could perceive to have influenced, or that give the appearance of potentially influencing, what you wrote in the submitted work?**  
No.
- 2. **What is the manuscript title?**  
Heterologous SARS-CoV-2 Booster Vaccinations – Preliminary Report
- 3. **Are you the corresponding author?**  
No.

**Certification**

I certify that the information provided in this disclosure is complete and accurate.



Disclosure Purpose: 21-16414

Summary of Interests

**Company or Organization**

| Entity | Type             | Interest Held By |
|--------|------------------|------------------|
| Pfizer | Grant / Contract | Self             |

*Recipient Name:* Cincinnati Children's Hospital Medical Center  
*Grant / Contract Description:* Clinical Trial grant for COVID-19 vaccines  
*Additional Information:*

*Recipient Type:* Institution  
*Grant / Contract Purpose:* Research

Additional Questions:

- Are there other relationships or activities that readers could perceive to have influenced, or that give the appearance of potentially influencing, what you wrote in the submitted work?  
No.
- What is the manuscript title?  
Heterologous SARS-CoV-2 Booster Vaccinations – Preliminary Report
- Are you the corresponding author?  
No.

Certification

I certify that the information provided in this disclosure is complete and accurate.

Disclosure Purpose: 21-16414

Summary of Interests

**Company or Organization**

| Entity                                                                                                                                                                           | Type             | Interest Held By                                                                |
|----------------------------------------------------------------------------------------------------------------------------------------------------------------------------------|------------------|---------------------------------------------------------------------------------|
| National Institutes of Health                                                                                                                                                    | Grant / Contract | Self                                                                            |
| <i>Recipient Name:</i> Kaiser Permanente Washington<br><i>Grant / Contract Description:</i> Funding for the conduct of a Phase 3 vaccine trial<br><i>Additional Information:</i> |                  | <i>Recipient Type:</i> Institution<br><i>Grant / Contract Purpose:</i> Research |

Additional Questions:

- Are there other relationships or activities that readers could perceive to have influenced, or that give the appearance of potentially influencing, what you wrote in the submitted work?**  
No.
- What is the manuscript title?**  
Heterologous SARS-CoV-2 Booster Vaccinations – Preliminary Report
- Are you the corresponding author?**  
No.

Certification

I certify that the information provided in this disclosure is complete and accurate.

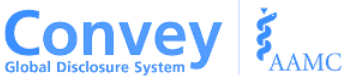

**Disclosure Purpose:** 21-16414

## Summary of Interests

| Company or Organization                                                                                                             | Entity          | Type                                                                                                   | Interest Held By |
|-------------------------------------------------------------------------------------------------------------------------------------|-----------------|--------------------------------------------------------------------------------------------------------|------------------|
|                                                                                                                                     | AbbVie          | Consultant                                                                                             | Self             |
| <i>Category:</i> Consultant<br><i>Additional Information:</i>                                                                       |                 | <i>Description:</i> Consultant on clinical trials related to COVID-19 therapeutics                     |                  |
|                                                                                                                                     | Gilead Sciences | Consultant                                                                                             | Self             |
| <i>Category:</i> Consultant<br><i>Additional Information:</i> Gave a talk on HSV infection and Alzheimer's Disease to Gilead group. |                 | <i>Description:</i> HSV consultant                                                                     |                  |
|                                                                                                                                     | Medpace         | Data And Safety Monitoring                                                                             | Self             |
| <i>Category:</i> Data And Safety Monitoring<br><i>Additional Information:</i>                                                       |                 | <i>Description:</i> Chair of a DSMB for a COVID-19 therapeutic trial, which has since been terminated. |                  |

## Additional Questions:

- Are there other relationships or activities that readers could perceive to have influenced, or that give the appearance of potentially influencing, what you wrote in the submitted work?**  
No.
- What is the manuscript title?**  
Heterologous SARS-CoV-2 Booster Vaccinations – Preliminary Report
- Are you the corresponding author?**  
No.

## Certification

I certify that the information provided in this disclosure is complete and accurate.

**Disclosure Purpose:** 21-16414

### Summary of Interests

I do not have any interests to disclose at this time.

### Additional Questions:

- Are there other relationships or activities that readers could perceive to have influenced, or that give the appearance of potentially influencing, what you wrote in the submitted work?**  
No.
- What is the manuscript title?**  
Heterologous SARS-CoV-2 Booster Vaccinations – Preliminary Report
- Are you the corresponding author?**  
No.

### Certification

I certify that the information provided in this disclosure is complete and accurate.

**Disclosure Purpose:** 21-16414

## Summary of Interests

| Company or Organization                                                         |       |                                                               |
|---------------------------------------------------------------------------------|-------|---------------------------------------------------------------|
| Entity                                                                          | Type  | Interest Held By                                              |
| <a href="#">Pfizer Inc.</a>                                                     | Other | Self                                                          |
| <i>Category:</i> Other<br><i>Additional Information:</i> Receive salary support |       | <i>Description:</i> Clinical Investigator on COVID-19 trials. |

## Additional Questions:

- Are there other relationships or activities that readers could perceive to have influenced, or that give the appearance of potentially influencing, what you wrote in the submitted work?**  
No.
- What is the manuscript title?**  
Heterologous SARS-CoV-2 Booster Vaccinations – Preliminary Report
- Are you the corresponding author?**  
No.

## Certification

I certify that the information provided in this disclosure is complete and accurate.

Disclosure Purpose: 21-16414

Summary of Interests

**Company or Organization**

| Entity                                                        | Type       | Interest Held By                                       |
|---------------------------------------------------------------|------------|--------------------------------------------------------|
| <a href="#">Merck</a>                                         | Consultant | Self                                                   |
| <i>Category:</i> Consultant<br><i>Additional Information:</i> |            | <i>Description:</i> consultant on an unrelated project |

Additional Questions:

- Are there other relationships or activities that readers could perceive to have influenced, or that give the appearance of potentially influencing, what you wrote in the submitted work?**  
No.
- What is the manuscript title?**  
Heterologous SARS-CoV-2 Booster Vaccinations – Preliminary Report
- Are you the corresponding author?**  
No.

Certification

I certify that the information provided in this disclosure is complete and accurate.

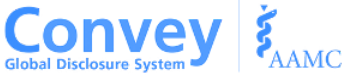

**Disclosure Purpose:** 21-16414

### Summary of Interests

I do not have any interests to disclose at this time.

### Additional Questions:

- Are there other relationships or activities that readers could perceive to have influenced, or that give the appearance of potentially influencing, what you wrote in the submitted work?**  
No.
- What is the manuscript title?**  
Heterologous SARS-CoV-2 Booster Vaccinations
- Are you the corresponding author?**  
No.

### Certification

I certify that the information provided in this disclosure is complete and accurate.



**Disclosure Purpose:** 21-16414

### Summary of Interests

I do not have any interests to disclose at this time.

### Additional Questions:

- Are there other relationships or activities that readers could perceive to have influenced, or that give the appearance of potentially influencing, what you wrote in the submitted work?**  
No.
- What is the manuscript title?**  
Heterologous SARS-CoV2 Booster Vaccinations
- Are you the corresponding author?**  
No.

### Certification

I certify that the information provided in this disclosure is complete and accurate.

**Disclosure Purpose:** 21-16414

## Summary of Interests

| Company or Organization                                                                                                                                                          |                  |                                                                                                                   |
|----------------------------------------------------------------------------------------------------------------------------------------------------------------------------------|------------------|-------------------------------------------------------------------------------------------------------------------|
| Entity                                                                                                                                                                           | Type             | Interest Held By                                                                                                  |
| Moderna                                                                                                                                                                          | Grant / Contract | Self                                                                                                              |
| <i>Recipient Name:</i> David C. Montefiori<br><i>Grant / Contract Description:</i> Laboratory assessments of neutralizing antibody responses in COVID-19 vaccine clinical trials |                  | <i>Recipient Type:</i> Institution<br><i>Grant / Contract Purpose:</i> Research<br><i>Additional Information:</i> |

## Additional Questions:

- Are there other relationships or activities that readers could perceive to have influenced, or that give the appearance of potentially influencing, what you wrote in the submitted work?**  
Yes.
  - Please describe those relationships.**  
Dr. Montefiori's laboratory received research funding from Moderna
- What is the manuscript title?**  
Heterologous SARS-CoV-2 Booster Vaccinations – Preliminary Report
- Are you the corresponding author?**  
No.

## Certification

I certify that the information provided in this disclosure is complete and accurate.

# Mark Mulligan

Disclosure Purpose: 21-16414

## Summary of Interests

### Company or Organization

| Entity                                                                                                                                                                                                                         | Type             | Interest Held By                                                                |
|--------------------------------------------------------------------------------------------------------------------------------------------------------------------------------------------------------------------------------|------------------|---------------------------------------------------------------------------------|
| <a href="#">Eli Lilly and Company</a>                                                                                                                                                                                          | Grant / Contract | Self                                                                            |
| <i>Recipient Name:</i> Mark J. Mulligan MD FIDSA<br><i>Grant / Contract Description:</i> clinical research; laboratory research<br><i>Additional Information:</i>                                                              |                  | <i>Recipient Type:</i> Institution<br><i>Grant / Contract Purpose:</i> Research |
| <a href="#">meissa vaccines</a>                                                                                                                                                                                                | Consultant       | Self                                                                            |
| <i>Category:</i> Consultant<br><i>Additional Information:</i> relating to covid vaccine development                                                                                                                            |                  | <i>Description:</i> scientific advisory board                                   |
| <a href="#">Merck</a>                                                                                                                                                                                                          | Other            | Self                                                                            |
| <i>Category:</i> Other<br><i>Additional Information:</i>                                                                                                                                                                       |                  | <i>Description:</i> Scientific Advisory Board                                   |
| <a href="#">Pfizer</a>                                                                                                                                                                                                         | Grant / Contract | Self                                                                            |
| <i>Recipient Name:</i> Mark Mulligan<br><i>Grant / Contract Description:</i> Pfizer Covid vaccines clinical trials<br><i>Additional Information:</i> research contract to NYU; i also serve on the Pfizer covid advisory board |                  | <i>Recipient Type:</i> Institution<br><i>Grant / Contract Purpose:</i> Research |
| <a href="#">SANOFI PASTEUR INC.</a>                                                                                                                                                                                            | Grant / Contract | Self                                                                            |
| <i>Recipient Name:</i> Mark J. Mulligan MD FIDSA<br><i>Grant / Contract Description:</i> vaccine trials<br><i>Additional Information:</i>                                                                                      |                  | <i>Recipient Type:</i> Institution<br><i>Grant / Contract Purpose:</i> Research |

### Additional Questions:

- Are there other relationships or activities that readers could perceive to have influenced, or that give the appearance of potentially influencing, what you wrote in the submitted work?**

No.
- What is the manuscript title?**

Heterologous SARS-CoV-2 Booster Vaccinations – Preliminary Report
- Are you the corresponding author?**

No.

### Certification

I certify that the information provided in this disclosure is complete and accurate.

**Disclosure Purpose:** 21-16414

**Summary of Interests**

I do not have any interests to disclose at this time.

**Additional Questions:**

- 1. **Are there other relationships or activities that readers could perceive to have influenced, or that give the appearance of potentially influencing, what you wrote in the submitted work?**  
No.
- 2. **What is the manuscript title?**  
Heterologous SARS-CoV-2 Booster Vaccinations – Preliminary Report
- 3. **Are you the corresponding author?**  
No.

**Certification**

I certify that the information provided in this disclosure is complete and accurate.



Disclosure Purpose: 21-16414

## Summary of Interests

### Company or Organization

| Entity                                                                                                                                                                                  | Type             | Interest Held By                                                                                                                                                                                                                                                                                                                                                                                   |
|-----------------------------------------------------------------------------------------------------------------------------------------------------------------------------------------|------------------|----------------------------------------------------------------------------------------------------------------------------------------------------------------------------------------------------------------------------------------------------------------------------------------------------------------------------------------------------------------------------------------------------|
| National Institute of Health                                                                                                                                                            | Grant / Contract | Self                                                                                                                                                                                                                                                                                                                                                                                               |
| <b>Recipient Name:</b> Dr. Kathleen Neuzil<br><b>Grant / Contract Description:</b> To participate in overall organization of COVID vaccine trials & for participation in vaccine trials |                  | <b>Recipient Type:</b> Individual<br><b>Grant / Contract Purpose:</b> Research<br><b>Additional Information:</b> Dr. Kathleen Neuzil receives grants from NIH to participate in overall organization of COVID vaccine trials and for participation in vaccine trials                                                                                                                               |
| Pfizer Inc.                                                                                                                                                                             | Grant / Contract | Other - University of Maryland School of Medicine Center for Vaccine Development and Global Health                                                                                                                                                                                                                                                                                                 |
| <b>Recipient Name:</b> University of Maryland School of Medicine Center for Vaccine Development and Global Health<br><b>Grant / Contract Purpose:</b> Research                          |                  | <b>Recipient Type:</b> Institution<br><b>Grant / Contract Description:</b> Conducts clinical trials of COVID vaccines.<br><b>Additional Information:</b> The University of Maryland School of Medicine Center for Vaccine Development and Global Health (CVD) receives grants from Pfizer to conduct clinical trials of COVID vaccines. Dr. Kathy Neuzil receives no salary support on this grant. |

## Additional Questions:

- Are there other relationships or activities that readers could perceive to have influenced, or that give the appearance of potentially influencing, what you wrote in the submitted work?**  
No.
- What is the manuscript title?**  
Heterologous SARS-CoV-2 Booster Vaccinations – Preliminary Report
- Are you the corresponding author?**  
No.

## Certification

I certify that the information provided in this disclosure is complete and accurate.

**Disclosure Purpose:** 21-16414

**Summary of Interests**

I do not have any interests to disclose at this time.

**Additional Questions:**

- 1. **Are there other relationships or activities that readers could perceive to have influenced, or that give the appearance of potentially influencing, what you wrote in the submitted work?**  
No.
- 2. **What is the manuscript title?**  
Heterologous SARS-CoV-2 Booster Vaccinations – Preliminary Report
- 3. **Are you the corresponding author?**  
No.

**Certification**

I certify that the information provided in this disclosure is complete and accurate.



**Disclosure Purpose:** 21-16414

**Summary of Interests**

I do not have any interests to disclose at this time.

**Additional Questions:**

- 1. **Are there other relationships or activities that readers could perceive to have influenced, or that give the appearance of potentially influencing, what you wrote in the submitted work?**  
No.
- 2. **What is the manuscript title?**  
Heterologous SARS-CoV-2 Booster Vaccinations – Preliminary Report
- 3. **Are you the corresponding author?**  
No.

**Certification**

I certify that the information provided in this disclosure is complete and accurate.



**Disclosure Purpose:** 21-16414

### Summary of Interests

I do not have any interests to disclose at this time.

### Additional Questions:

- Are there other relationships or activities that readers could perceive to have influenced, or that give the appearance of potentially influencing, what you wrote in the submitted work?**  
No.
- What is the manuscript title?**  
Heterologous SARS-CoV-2 Booster Vaccinations – Preliminary Report
- Are you the corresponding author?**  
No.

### Certification

I certify that the information provided in this disclosure is complete and accurate.



**Disclosure Purpose:** 21-16414

**Summary of Interests**

I do not have any interests to disclose at this time.

**Additional Questions:**

- 1. **Are there other relationships or activities that readers could perceive to have influenced, or that give the appearance of potentially influencing, what you wrote in the submitted work?**  
No.
- 2. **What is the manuscript title?**  
Heterologous SARS-CoV-2 Booster Vaccination -Preliminary Report
- 3. **Are you the corresponding author?**  
No.

**Certification**

I certify that the information provided in this disclosure is complete and accurate.

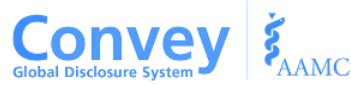

Disclosure Purpose: 21-16414

## Summary of Interests

| Company or Organization                                                                                                       | Type  | Interest Held By                                                                           |
|-------------------------------------------------------------------------------------------------------------------------------|-------|--------------------------------------------------------------------------------------------|
| <a href="#">Janssen Biotech, Inc.</a><br><i>Category:</i> Other<br><i>Additional Information:</i> Funding to Emory University | Other | Self<br><i>Description:</i> Sub-investigator on Janssen Ensemble COVID-19 vaccine study    |
| <a href="#">Moderna, Inc.</a><br><i>Category:</i> Other<br><i>Additional Information:</i>                                     | Other | Self<br><i>Description:</i> Sub-investigator on COVID-19 vaccine studies COVE and Kid-COVE |
| <a href="#">Pfizer Inc.</a><br><i>Category:</i> Other<br><i>Additional Information:</i> Funding to Emory University           | Other | Self<br><i>Description:</i> Sub-investigator on Pfizer Pediatric COVID-19 vaccine study    |

| Intellectual Property                                                                                                                                                                                                                               | Type     | Is Licensed | Interest Held By                                                                                                           |                      |  |  |  |  |  |
|-----------------------------------------------------------------------------------------------------------------------------------------------------------------------------------------------------------------------------------------------------|----------|-------------|----------------------------------------------------------------------------------------------------------------------------|----------------------|--|--|--|--|--|
| <a href="#">Patent - Chimeric RSV, Immunogenic Compositions, and Meth ...</a><br><i>Description:</i> Chimeric RSV, Immunogenic Compositions, and Methods of Use<br><i>Patent Status:</i> Issued<br><i>Filing Jurisdiction:</i><br><i>Licensees:</i> |          | Yes         | Self<br><i>Patent Number:</i> US2016/058976<br><i>Patent Holder:</i> Current Institution<br><i>Additional Information:</i> |                      |  |  |  |  |  |
| <table border="1"><thead><tr><th>Licensee</th><th>Title</th><th>Date</th></tr></thead><tbody><tr><td>Meissa Vaccines, Inc</td><td></td><td></td></tr></tbody></table>                                                                               | Licensee | Title       | Date                                                                                                                       | Meissa Vaccines, Inc |  |  |  |  |  |
| Licensee                                                                                                                                                                                                                                            | Title    | Date        |                                                                                                                            |                      |  |  |  |  |  |
| Meissa Vaccines, Inc                                                                                                                                                                                                                                |          |             |                                                                                                                            |                      |  |  |  |  |  |

Additional Questions:

- Are there other relationships or activities that readers could perceive to have influenced, or that give the appearance of potentially influencing, what you wrote in the submitted work?  
No.
- What is the manuscript title?  
Heterologous SARS-CoV-2 Booster Vaccinations – Preliminary Report
- Are you the corresponding author?  
No.

Certification

I certify that the information provided in this disclosure is complete and accurate.

**Disclosure Purpose:** 21-16414

**Summary of Interests**

I do not have any interests to disclose at this time.

**Additional Questions:**

- 1. **Are there other relationships or activities that readers could perceive to have influenced, or that give the appearance of potentially influencing, what you wrote in the submitted work?**  
No.
- 2. **What is the manuscript title?**  
Heterologous SARS-CoV-2 Booster Vaccinations – Preliminary Report
- 3. **Are you the corresponding author?**  
No.

**Certification**

I certify that the information provided in this disclosure is complete and accurate.



**Disclosure Purpose:** 21-16414

**Summary of Interests**

I do not have any interests to disclose at this time.

**Additional Questions:**

- 1. **Are there other relationships or activities that readers could perceive to have influenced, or that give the appearance of potentially influencing, what you wrote in the submitted work?**  
No.
- 2. **What is the manuscript title?**  
Heterologous SARS-CoV-2 Booster Vaccinations – Preliminary Report
- 3. **Are you the corresponding author?**  
No.

**Certification**

I certify that the information provided in this disclosure is complete and accurate.

Disclosure Purpose: 21-16414

## Summary of Interests

| Company or Organization                                       |            |                                                                                                           |
|---------------------------------------------------------------|------------|-----------------------------------------------------------------------------------------------------------|
| Entity                                                        | Type       | Interest Held By                                                                                          |
| <a href="#">ModernaTX</a>                                     | Consultant | Self                                                                                                      |
| <i>Category:</i> Consultant<br><i>Additional Information:</i> |            | <i>Description:</i> Consultation service to ModernaTX on the Epidemiology COVID-19 Variant Advisory Board |
| <a href="#">Ocugen</a>                                        | Consultant | Self                                                                                                      |
| <i>Category:</i> Consultant<br><i>Additional Information:</i> |            | <i>Description:</i> I serve in an advisory role for Ocugen                                                |

## Additional Questions:

- Are there other relationships or activities that readers could perceive to have influenced, or that give the appearance of potentially influencing, what you wrote in the submitted work?**  
No.
- What is the manuscript title?**  
Heterologous SARS-CoV-2 Booster Vaccinations
- Are you the corresponding author?**  
No.

## Certification

I certify that the information provided in this disclosure is complete and accurate.

**Disclosure Purpose:** 21-16414

**Summary of Interests**

I do not have any interests to disclose at this time.

**Additional Questions:**

- 1. **Are there other relationships or activities that readers could perceive to have influenced, or that give the appearance of potentially influencing, what you wrote in the submitted work?**  
No.
- 2. **What is the manuscript title?**  
Heterologous SARS-CoV-2 Booster Vaccinations - Preliminary Report
- 3. **Are you the corresponding author?**  
No.

**Certification**

I certify that the information provided in this disclosure is complete and accurate.



**Disclosure Purpose:** 21-16414

**Summary of Interests**

I do not have any interests to disclose at this time.

**Additional Questions:**

- 1. **Are there other relationships or activities that readers could perceive to have influenced, or that give the appearance of potentially influencing, what you wrote in the submitted work?**  
No.
- 2. **What is the manuscript title?**  
Heterologous SARS-CoV-2 Booster Vaccinations – Preliminary Report
- 3. **Are you the corresponding author?**  
No.

**Certification**

I certify that the information provided in this disclosure is complete and accurate.
